# Supplementary material
Source: publisher site journal article supplement (https://www.spandidos-publications.com/3429/downloadSupplementary)

Figure S1. Spacer with bolus in Case 2. (A) An image of the carcinoma of the oral floor. (B) Spacer with bolus adjusted to adhere to the lesion site. (C) Spacer with bolus is shown mounted in the mouth. (D) A image with complete response obtained after radiotherapy using the applied spacer.

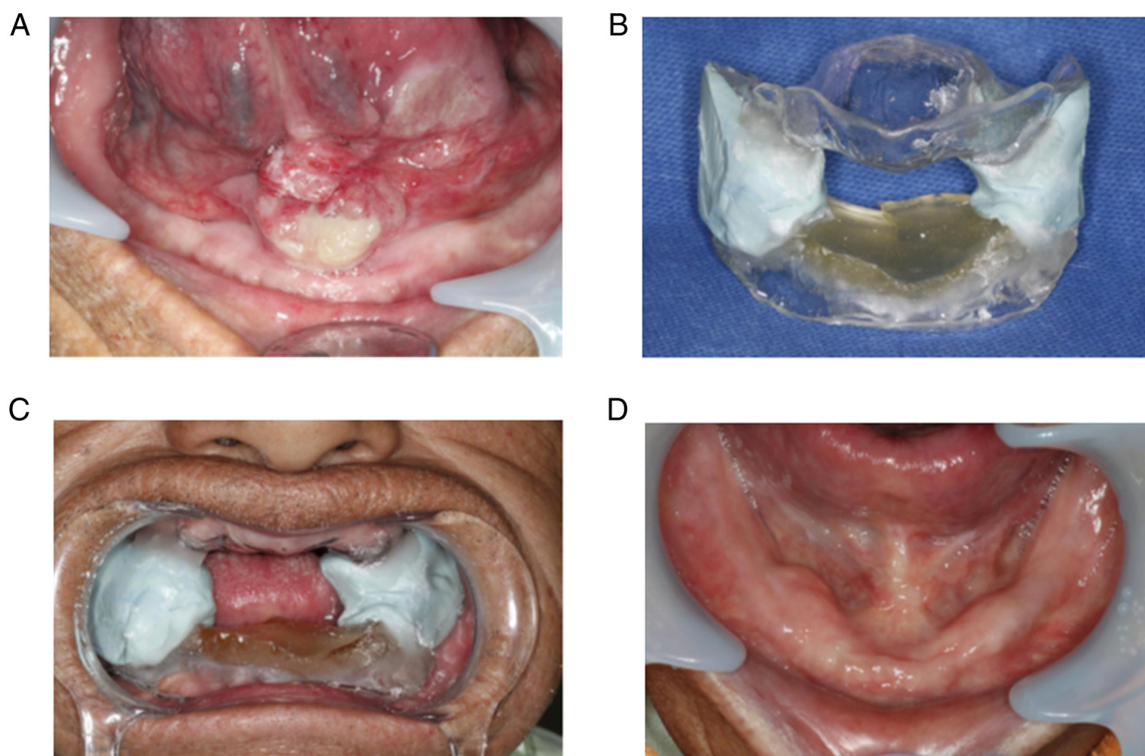

Supplement: Supplementary file 1 [file downloadSupplementary]
